# Supplementary material
Source: PubMed Central journal article supplement (PMC7395859)
Supplement: NIHMS1568673-supplement-1.pdf [file NIHMS1568673-supplement-1.pdf]

**Supplemental Table 1: Survey Questions and Answer Options**

| Survey Question                                                                                                                                                                    | Answer Options                                                                                                                                                                                                                                                                                                                                                                                                                                                                                          |
|------------------------------------------------------------------------------------------------------------------------------------------------------------------------------------|---------------------------------------------------------------------------------------------------------------------------------------------------------------------------------------------------------------------------------------------------------------------------------------------------------------------------------------------------------------------------------------------------------------------------------------------------------------------------------------------------------|
| Have you ever heard of pills that you can use to have an abortion at home, WITHOUT ever going to a clinic or speaking to a doctor?                                                 | Yes<br>No                                                                                                                                                                                                                                                                                                                                                                                                                                                                                               |
| NOTE: These pills are NOT the same as Plan B or Emergency Contraception                                                                                                            |                                                                                                                                                                                                                                                                                                                                                                                                                                                                                                         |
| Some people in the US get pills without going to a clinic or speaking to a doctor and use them to have an abortion at home. Would you ever consider doing this?                    | Yes<br>No                                                                                                                                                                                                                                                                                                                                                                                                                                                                                               |
| Before you came to the clinic today, did you consider buying pills to have an abortion or end your pregnancy at home, without coming to the clinic or speaking to a doctor?        | Yes<br>No                                                                                                                                                                                                                                                                                                                                                                                                                                                                                               |
| Did you try using the pills to have an abortion at home, without coming to the clinic or speaking to a doctor?                                                                     | Yes<br>No                                                                                                                                                                                                                                                                                                                                                                                                                                                                                               |
| Before you came to the clinic today, did you consider or try ending your pregnancy yourself using any other method BESIDES pills?                                                  | Yes<br>No                                                                                                                                                                                                                                                                                                                                                                                                                                                                                               |
| Please tell us a little more about why you would consider buying pills and using them to have an abortion at home instead of going to a clinic.<br><br>Please check ALL that apply | It is hard to find money to pay for an abortion at a clinic<br>It is hard to get to a clinic because it's far away<br>It is hard to take time away from work, school, and/or family to get to the clinic<br>I can't tell my family that I'm going to have an abortion<br>I would prefer the privacy of using pills at home<br>I would prefer to take care of my abortion by myself<br>It would be more convenient to buy the pills myself and have my abortion at home<br>Other reason (please specify) |
| What age are you?                                                                                                                                                                  | Under 20<br>20-24<br>25-29<br>30-34<br>35-39<br>40-44<br>45-50<br>Over 50                                                                                                                                                                                                                                                                                                                                                                                                                               |
| How many weeks pregnant are you now?                                                                                                                                               | Under 10 weeks<br>10 - 16 weeks<br>Over 16 week                                                                                                                                                                                                                                                                                                                                                                                                                                                         |

|                                                                                                                                   |                                                                                                                                                                                                                                                                                                                                                                                                                                                                                                          |
|-----------------------------------------------------------------------------------------------------------------------------------|----------------------------------------------------------------------------------------------------------------------------------------------------------------------------------------------------------------------------------------------------------------------------------------------------------------------------------------------------------------------------------------------------------------------------------------------------------------------------------------------------------|
| Are you of Hispanic or Latino origin?                                                                                             | Yes<br>No                                                                                                                                                                                                                                                                                                                                                                                                                                                                                                |
| With what racial group do you identify?<br>Please check ALL that apply.                                                           | Black or African American<br>White<br>Asian<br>American Indian or Alaska Native<br>Other (please specify)                                                                                                                                                                                                                                                                                                                                                                                                |
| In which country were you born?                                                                                                   | U.S<br>Mexico<br>Other country (please specify)                                                                                                                                                                                                                                                                                                                                                                                                                                                          |
| How many children do you have?                                                                                                    | 0<br>1<br>2<br>3<br>4<br>5<br>6<br>7<br>8 or more                                                                                                                                                                                                                                                                                                                                                                                                                                                        |
| Does anybody in your household receive any of the following programs?<br><br>Please check ALL that apply                          | Medicaid<br>TANF (Welfare)<br>CEAP<br>SNAP (Food stamps)<br>WIC<br>CHIP (Children's Health Insurance Program)<br>SSI (Social Security Insurance)<br>Other (please specify)<br>Nobody in my household receives any of these programs                                                                                                                                                                                                                                                                      |
| Did you experience any difficulties getting abortion care at this clinic?<br><br>Please check ALL that apply                      | Yes, it was hard to find money to pay for the abortion<br>Yes, it was hard to take time away from work and/or school or find child care<br>Yes, the clinic was far away<br>Yes, I had to find transportation to the clinic<br>Yes, I had to stay overnight<br>Yes, it was hard because I couldn't tell my family/partner where I was going<br>Yes, I had to wait a long time before the clinic could see me<br>I experienced another barrier not listed here<br>No, I didn't experience any difficulties |
| Has anyone you know ever tried to have an abortion using pills they bought themselves and used at home without going to a clinic? | Yes<br>No                                                                                                                                                                                                                                                                                                                                                                                                                                                                                                |
